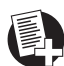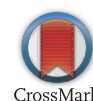

# Prevention and Reversal of Type 1 Diabetes—Past Challenges and Future Opportunities

Jay S. Skyler

*Diabetes Care* 2015;38:997–1007 | DOI: 10.2337/dc15-0349

Over the past three decades there have been a number of clinical trials directed at interdicting the type 1 diabetes (T1D) disease process in an attempt to prevent the development of the disease in those at increased risk or to stabilize—potentially even reverse—the disease in people with T1D, usually of recent onset. Unfortunately, to date there has been no prevention trial that has resulted in delay or prevention of T1D. And, trials in people with T1D have had mixed results with some showing promise with at least transient improvement in  $\beta$ -cell function compared with randomized control groups, while others have failed to slow the decline in  $\beta$ -cell function when compared with placebo. This Perspective will assess the past and present challenges in this effort and provide an outline for potential future opportunities.

## THE BEGINNINGS

The first randomized, double-masked, controlled trials with sufficient statistical power to give confidence for the outcome were conducted in the mid-1980s with cyclosporine (1,2). Two large studies were conducted—the French cyclosporine study that included 122 patients with type 1 diabetes (T1D) aged 15–40 years who had been symptomatic for 6 months or less and were on insulin therapy for 2 months or less (1) and the Canadian-European cyclosporine study that included 188 subjects aged 9–35 years who had been symptomatic for 14 weeks or less and were on insulin therapy for 6 weeks or less (2). Both trials used as their primary outcome the achievement of remission defined two ways. First, “complete remission” was defined as good metabolic control (fasting glucose  $<140$  mg/dL [7.8 mmol/L], postprandial glucose  $<200$  mg/dL [11.1 mmol/L],  $HbA_{1c} \leq 7.5\%$ ) in the absence of insulin treatment. Second, “partial remission” was defined as good metabolic control with insulin dose  $<0.26$  units/kg per day. Both studies found a greater proportion of cyclosporine patients than placebo patients achieving and maintaining remissions. In both studies, cyclosporine could be given for 1 year, with stopping rules in place that led to blinded substitution of placebo for cyclosporine if remission was lost. Although both studies found that cyclosporine had superior efficacy than placebo, the magnitude and duration of benefit did not appear sufficient to justify cyclosporine treatment in clinical practice, given the potential of cyclosporine-induced nephrotoxicity. The importance of the studies, however, was that they demonstrated the impact of immune intervention on the evolution of T1D, in a sense fulfilling Koch postulates, which were developed for infectious diseases, but the response to immune therapy can be considered as indicative that T1D is immune mediated.

## CHALLENGES COMPLICATING PREVIOUS STUDIES

Since the completion of the early trials, particularly during the past decade, a number of additional randomized, double-masked, adequately powered, controlled

Diabetes Research Institute, University of Miami Miller School of Medicine, Miami, FL

Corresponding author: Jay S. Skyler, jskyler@miami.edu.

Received 16 February 2015 and accepted 17 March 2015.

© 2015 by the American Diabetes Association. Readers may use this article as long as the work is properly cited, the use is educational and not for profit, and the work is not altered.

See accompanying articles, pp. 968, 971, 979, 989, 1008, 1016, 1030, and 1036.

clinical trials have been conducted using many different immunological strategies. For the most part, these have been disappointing, with none showing unambiguous benefit in preserving  $\beta$ -cell function. Some studies have shown transient benefit with anti-CD3 monoclonal antibodies targeting T cells (Fig. 1A and B) (3–6), an anti-CD20 monoclonal antibody (i.e., rituximab) targeting B cells (Fig. 1C) (7,8), and with a costimulation blocking agent (i.e., abatacept) that prevents immune activation (Fig. 1D) (9,10). One pilot study combining antithymocyte globulin (ATG) and granulocyte colony-stimulating factor (GCSF) suggested benefit (Fig. 1E) but awaits confirmation in a larger trial (11).

A number of other strategies have been without benefit in preserving  $\beta$ -cell function (12–17). In addition, some studies had ambiguous effects, not meeting the primary outcome measure (i.e., preservation of  $\beta$ -cell function) but showing potential benefit either on secondary outcome measures or mechanistic measures or in only a subgroup of subjects (18–20).

Thus, most immune intervention trials in T1D have either failed to achieve success in preserving  $\beta$ -cell function or have met that hurdle but have nonetheless shown only a transient effect. This has resulted in a flurry of editorial and commentary articles in peer-reviewed

journals that take a bleak look at the field. Rather than looking negatively on the results to date, an opportunity exists to examine the details of previous studies to identify what can be learned and what can be applied to future studies. To that end, several problems are notable, and these are detailed below.

### MISLEADING PILOT STUDIES

The Diabetes Prevention Trial–Type 1 Parenteral Insulin Trial was a fully powered, randomized, controlled clinical trial that enrolled 339 relatives of patients with T1D who were estimated to have at least a 50% risk of developing T1D in the next 5 years (21). To enroll these

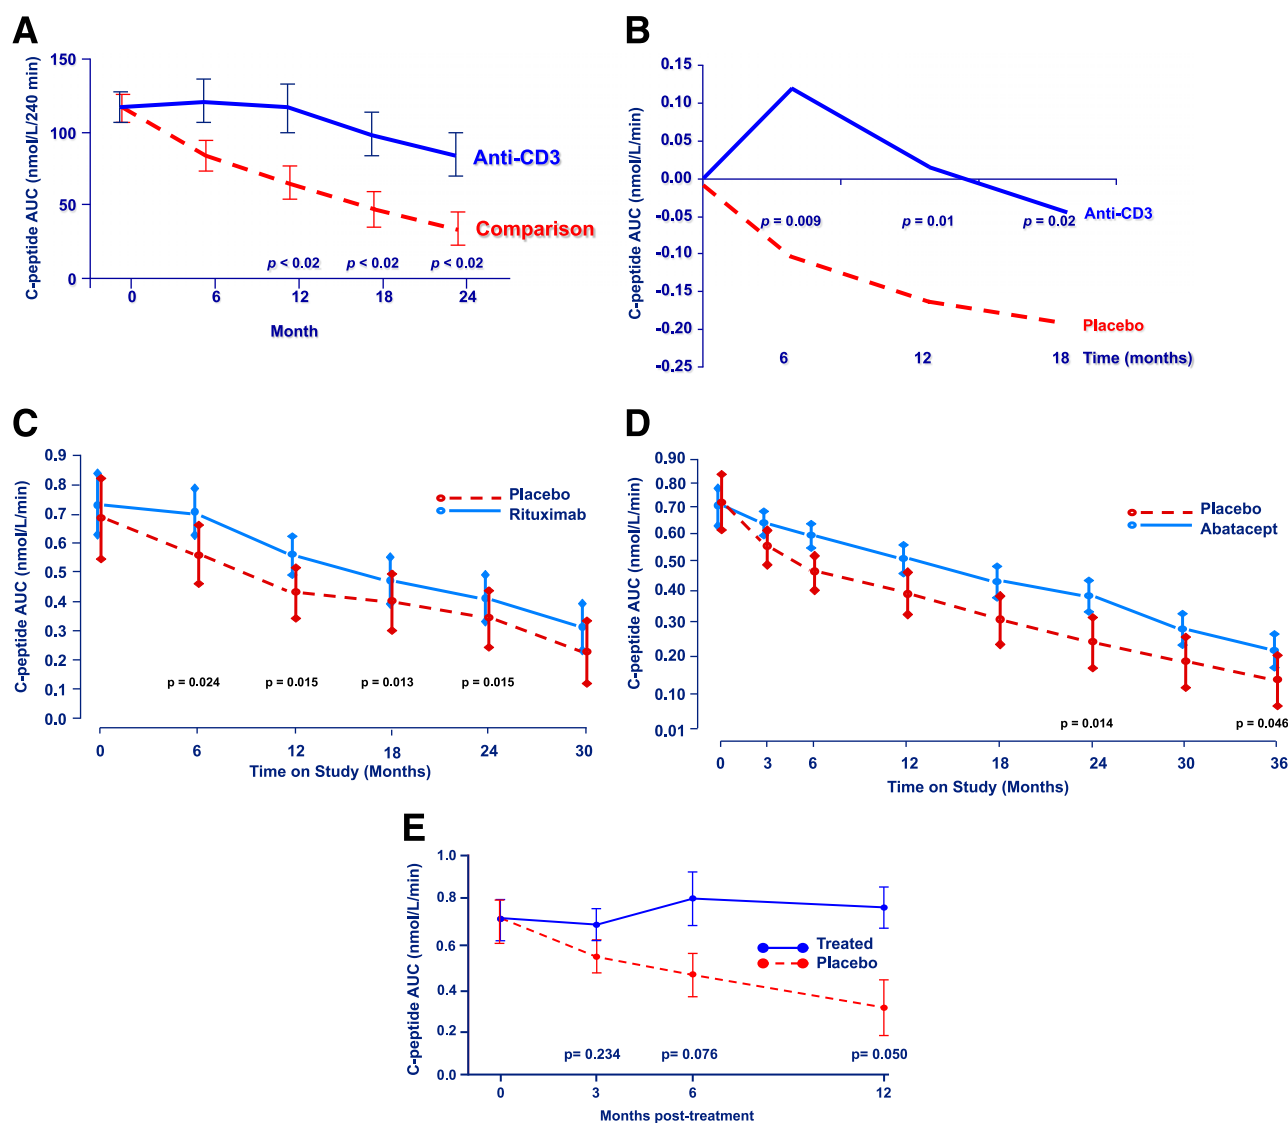

**Figure 1**—There has been a progressive decline in  $\beta$ -cell function, as measured by C-peptide, even in most studies that have been “successful,” thus showing only a transient benefit, as depicted for the anti-CD3 monoclonal antibody teplizumab (A) (3,4), the anti-CD3 monoclonal antibody oteplizumab (B) (5,6), the anti-CD20 monoclonal antibody rituximab (C) (7,8), and the costimulation blocker abatacept (D) (9,10). E: Also shown is the preservation of  $\beta$ -cell function in a pilot study (only 25 subjects randomized) with the combination of low-dose ATG plus GCSF (11), in which there is preservation of  $\beta$ -cell function at 1 year, something needing confirmation in a larger study.

subjects, more than 93,000 relatives were screened. The trial showed no difference in the rate of development of T1D (Fig. 2A) (21). This was a surprising outcome, as two pilot studies had suggested that the intervention—low-dose insulin—could delay the disease. One of those apparently promising pilot studies was a nonrandomized study of 12 individuals offered the intervention, 7 of whom declined and were analyzed as a comparison group, along with a group of historical control subjects of undefined number (Fig. 2B) (22). Life-table analysis suggested a statistically significant ( $P = 0.002$ ) and dramatic difference in rate of development of T1D. Interestingly, the

treated group was younger (mean age 10 years) than the untreated group (mean age 20.7 years), and one would have expected younger individuals to progress faster, which did not happen. In the other pilot trial, 14 subjects were randomized to insulin treatment or to the control group, with the insulin group having longer diabetes-free survival ( $P < 0.03$ ) (23).

The first study in T1D using GAD in a vaccine formulation with alum (GAD-alum) randomized 70 subjects, aged 10–18 years, within 18 months of diagnosis, to receive either two doses of GAD-alum or two doses of alum alone (24). The primary outcome measure,

fasting C-peptide at 15 months, showed no difference between groups. However, mixed-meal tolerance test (MMTT)-stimulated C-peptide was higher in GAD subjects who were treated within 6 months of diagnosis, but this included only 11 subjects treated with GAD and 14 treated with placebo (Fig. 2C). On the basis of this secondary subgroup outcome, three additional studies—all enrolling subjects within 3 months of diagnosis—were undertaken, including two phase 3 trials. A TrialNet study enrolled 145 subjects aged 3–45 years (Fig. 2D), a European phase 3 trial enrolled 334 subjects aged 10–20 years (Fig. 2E), and a U.S. phase 3 trial enrolled

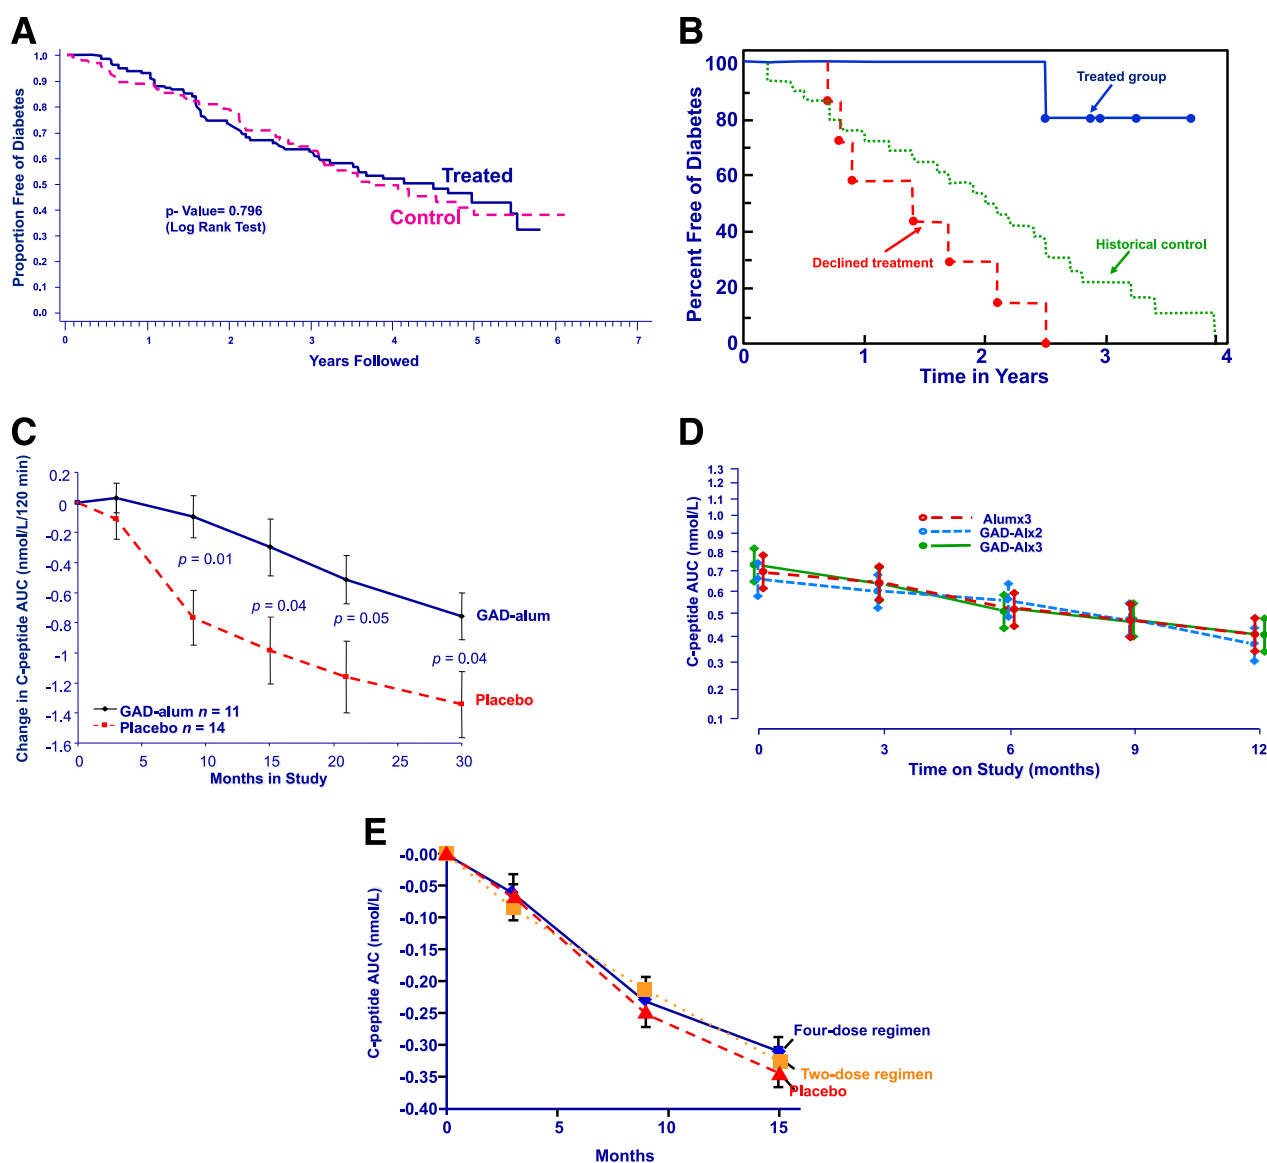

**Figure 2**—A: Life-table analysis showing lack of benefit in the fully powered DPT-1 Parenteral Insulin Trial (21), despite perceived benefit (by life-table analysis) in a small pilot study (B) (22). C: Putative benefit in a small subgroup (those treated within 6 months of diagnosis) in a GAD-alum vaccine trial (24) that was not confirmed in two larger trials (D and E) with GAD-vaccine (12,13).

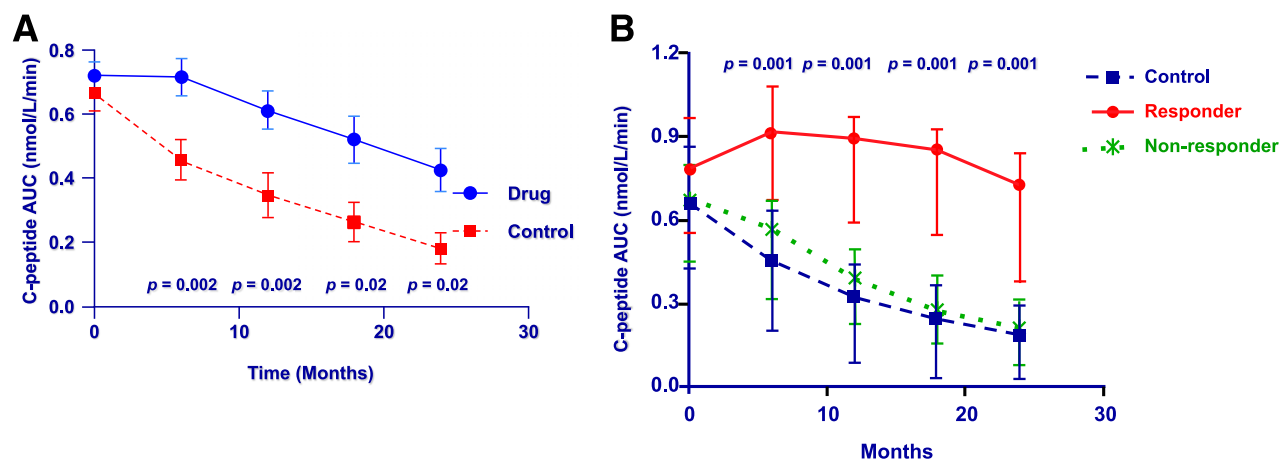

**Figure 3**—A: Transient effect of the anti-CD3 monoclonal antibody teplizumab in all treated subjects in one study (62). B: In that same study, retention of  $\beta$ -cell function for 2 years in responders, whereas nonresponders were identical to the comparison control group.

328 subjects aged 10–20 years (12,13,25). In all three of these trials, there was no evidence of a treatment effect with GAD-alum. Yet, it should be appreciated that the success of GAD in mice was approached differently. For example, the GAD-alum studies perhaps used the wrong formulation (with adjuvant). The studies could have used GAD-alum by the wrong route (subcutaneous) and at the wrong time (after clinical diagnosis of T1D). Although GAD vaccine still may be able to prevent or delay the development of T1D if used as a vaccine prior to disease onset, the results of these trials have greatly diminished the enthusiasm for GAD that once existed in our field.

Another approach considered was DiaPep277. DiaPep277 is a peptide derived from positions 437–460 of the human heat shock protein 60 (Hsp60), named peptide 277, that is alleged to induce anti-inflammatory T cells. The first report of its use in T1D was a pilot study in which 35 subjects, aged 16–55 years, with recent onset T1D, received either three doses of DiaPep277 or three doses of placebo (26). Primary outcome was glucagon-stimulated C-peptide at 10 months, which was higher in the DiaPep277 group than in the placebo group, an effect that was sustained with follow-up to 18 months (27). Four additional phase 2 studies showed results that were ambiguous at best, with no clear benefit (28–30). Nonetheless, the sponsor mounted two full-scale phase 3 trials. The first enrolled 457 subjects, aged 16–45 years, with recent-onset T1D, who received injections of DiaPep277 or placebo quarterly for 2 years (14,15). The initial

report alleged that glucagon-stimulated test (GST) of C-peptide at 24 months was improved in the DiaPep277 group versus the placebo group, although there was no difference in MMTT-stimulated C-peptide. However, MMTT was the original primary outcome measure and therefore was measured at randomization (month 0) and after 6, 12, 18, and 24 months—a total of 5 measurements. As GST originally was a secondary outcome measure, it was performed at month 1 (defined as “baseline” for the GST but 1 month after the first treatment had been given) and at 12 and 24 months—a total of 3 measurements. The authors intended, initially, to have MMTT be the primary outcome measure—they performed the first MMTT before initiating treatment (a true baseline measurement) and conducted the test at more frequent intervals. However, the primary outcome measure was changed from the MMTT to the GST. Specifically, it was stated “the study protocol was amended and the Statistical Analysis Plan was planned and finalized before the study was unblinded, with the GST clearly defined as the primary endpoint” (14). Had that really been the case, it raised questions of why differences in these two outcome measures existed and led to the question of whether both measures would be needed in future trials (31). However, subsequently the article was retracted with a statement that there had been evidence uncovered that some employees of the sponsor had engaged in serious misconduct, including collusion with a third-party biostatistics firm to improperly receive unblinded trial data and to use such data in order to manipulate the analyses to obtain a favorable result.

Another pilot study involved the use of Bacillus Calmette-Guérin (BCG) vaccine in six subjects with long-standing T1D who were randomized to receive either two doses of BCG or placebo (32). The authors claimed that the BCG subjects, and one of the three control subjects who developed acute Epstein-Barr virus (EBV) infection, showed increases in dead insulin-autoreactive T cells and induction of regulatory T cells. They also claimed that there was transient increase in C-peptide levels not seen in a nonrandomized cohort of subjects with T1D in their institution. They have garnered a lot of publicity for this very tiny study. Although the authors reported an increase in C-peptide levels using an ultrasensitive assay, there are no data that the trivial increases in C-peptide have any biological importance. Moreover, two larger previous randomized clinical trials of BCG, involving 26 and 47 subjects, showed no effect of BCG on preservation of  $\beta$ -cell function, but in both trials there was a trend to greater decline of  $\beta$ -cell function in the BCG group than in the control group (33,34).

What can one then conclude about the value of pilot studies in this area? Essentially, the bottom line is that pilot studies must be viewed with great caution and definitive answers can only be obtained by adequately powered randomized controlled trials.

#### FAILURE TO DISTINGUISH TRANSIENT SYMPTOMS FROM SERIOUS ADVERSE EVENTS

A number of interventions used in recent-onset T1D have shown transient symptoms related to cytokine release

**Table 1—Immune intervention trials in T1D**

| Study name                          | Intervention                    | Outcome                                               | Result                                            | Year reported | Reference |
|-------------------------------------|---------------------------------|-------------------------------------------------------|---------------------------------------------------|---------------|-----------|
| <b>Primary prevention studies</b>   |                                 |                                                       |                                                   |               |           |
| Finnish TRIGR pilot                 | Casein hydrolysate formula      | Autoantibodies                                        | Apparent benefit                                  | 2010          | 66        |
| TRIGR                               | Casein hydrolysate formula      | Autoantibodies                                        | No difference                                     | 2014          | 67        |
| FINDIA                              | Insulin-free whey-based formula | Autoantibodies                                        | Apparent benefit                                  | 2012          | 68        |
| BABYDIET                            | Gluten-free diet                | Autoantibodies                                        | No difference                                     | 2011          | 69        |
| TRIGR                               | Casein hydrolysate formula      | Diagnosis of T1D                                      | *                                                 | Ongoing       | 67        |
| <b>Secondary prevention studies</b> |                                 |                                                       |                                                   |               |           |
| DENIS                               | Nicotinamide                    | Diagnosis of T1D                                      | No difference                                     | 1998          | 70        |
| ENDIT                               | Nicotinamide                    | Diagnosis of T1D                                      | No difference                                     | 2004          | 71        |
| DPT-1 Parenteral Insulin            | Injected insulin                | Diagnosis of T1D                                      | No difference                                     | 2002          | 21        |
| DPT-1 Oral Insulin                  | Oral insulin                    | Diagnosis of T1D                                      | No difference                                     | 2005          | 20        |
| Belgian parenteral insulin          | Injected insulin                | Diagnosis of T1D                                      | No difference                                     | 2009          | 51        |
| DIPP birth cohort                   | Nasal insulin                   | Diagnosis of T1D                                      | No difference                                     | 2008          | 52        |
| DIPP sibling cohort                 | Nasal insulin                   | Diagnosis of T1D                                      | No difference                                     | 2008          | 52        |
| INIT II                             | Nasal insulin                   | Diagnosis of T1D                                      | *                                                 | Ongoing       | 60        |
| DIAPREV-IT                          | GAD                             | Diagnosis of T1D                                      | *                                                 | Ongoing       | 58        |
| TrialNet oral insulin               | Oral insulin                    | Diagnosis of T1D                                      | *                                                 | Ongoing       | 59        |
| TrialNet teplizumab                 | Anti-CD3, teplizumab            | Diagnosis of T1D                                      | *                                                 | Ongoing       | 72        |
| TrialNet abatacept                  | Abatacept                       | Diagnosis of T1D                                      | *                                                 | Ongoing       | 73        |
| <b>Studies in recent-onset T1D</b>  |                                 |                                                       |                                                   |               |           |
| French cyclosporine                 | Cyclosporine                    | Remission                                             | Benefit                                           | 1986          | 1         |
| Canadian-European cyclosporine      | Cyclosporine                    | C-pep $\geq 0.6$ nmol/L or noninsulin treated         | Benefit                                           | 1988          | 2         |
| Azathioprine + glucocorticoids      | Azathioprine and prednisone     | Peak C-pep/glucose ratio                              | Benefit                                           | 1988          | 74        |
| Azathioprine, adults                | Azathioprine                    | Remission                                             | Benefit                                           | 1985          | 75        |
| Azathioprine, children              | Azathioprine                    | Partial remission                                     | No difference                                     | 1989          | 76        |
| Linomide French trial               | Linomide                        | Glucagon-stimulated C-pep                             | Benefit                                           | 1998          | 77        |
| BCG                                 | BCG vaccine                     | Glucagon-stimulated C-pep                             | No difference                                     | 1998          | 33        |
| BCG                                 | BCG vaccine                     | Primary, remission; secondary, MMTT C-pep             | No difference                                     | 1999          | 34        |
| French oral insulin                 | Oral insulin                    | Glucagon-stimulated C-pep                             | No difference                                     | 2000          | 53        |
| Italian oral insulin                | Oral insulin                    | Fasting C-pep                                         | No difference                                     | 2000          | 54        |
| U.S. oral insulin                   | Oral insulin                    | Loss of C-pep                                         | #                                                 | 2004          | 55        |
| Herold anti-CD3                     | Teplizumab                      | MMTT C-pep                                            | Benefit                                           | 2002, 2005    | 3,4       |
| Keymeulen anti-CD3                  | Otelixizumab                    | C-pep after clamp                                     | Benefit                                           | 2005, 2010    | 5,6       |
| Protégé                             | Teplizumab                      | Insulin $< 0.5$ unit/kg + HbA <sub>1c</sub> $< 6.5\%$ | No difference                                     | 2011, 2013    | 35,36     |
| Protégé Encore                      | Teplizumab                      | Insulin $< 0.5$ unit/kg + HbA <sub>1c</sub> $< 6.5\%$ | *                                                 | 2011          | 78        |
| DEFEND-1                            | Otelixizumab                    | MMTT C-pep                                            | No difference                                     | 2014          | 37        |
| DEFEND-2                            | Otelixizumab                    | MMTT C-pep                                            | No difference                                     | 2014          | 38        |
| AbATE (ITN study)                   | Teplizumab                      | MMTT C-pep                                            | Benefit                                           | 2013          | 62        |
| DELAY                               | Teplizumab                      | MMTT C-pep                                            | Benefit                                           | 2013          | 79        |
| GAD pilot                           | GAD-alum vaccine                | Fasting C-pep                                         | Apparent benefit in secondary outcome in subgroup | 2008          | 24        |
| GAD TrialNet                        | GAD-alum vaccine                | MMTT C-pep                                            | No difference                                     | 2011          | 12        |
| GAD Europe                          | GAD-alum vaccine                | MMTT C-pep                                            | No difference                                     | 2012          | 13        |
| GAD U.S. (DiaPrevent)               | GAD-alum vaccine                | MMTT C-pep                                            | N/A                                               | 2011          | 25        |
| DiaPep—Israeli adults               | DiaPep277 peptide               | Glucagon-stimulated C-pep                             | Benefit                                           | 2001, 2007    | 26,27     |
| DiaPep—Israeli pediatrics           | DiaPep277 peptide               | MMTT C-pep                                            | No difference                                     | 2007          | 28        |

Continued on p. 1002

Table 1—Continued

| Study name                            | Intervention                                     | Outcome                   | Result                 | Year reported       | Reference |
|---------------------------------------|--------------------------------------------------|---------------------------|------------------------|---------------------|-----------|
| DiaPep—Belgian adults                 | DiaPep277 peptide                                | Glucagon-stimulated C-pep | Benefit at one dose    | 2007                | 29        |
| DiaPep—Europe adults                  | DiaPep277 peptide                                | Glucagon-stimulated C-pep | No difference          | 2007                | 30        |
| DiaPep—Europe<br>pediatrics           | DiaPep277 peptide                                | Glucagon-stimulated C-pep | No difference          | 2007                | 30        |
| DiaPep—phase III                      | DiaPep277 peptide                                | Glucagon-stimulated C-pep | †                      | 2014                | 14,15     |
| MMF/DZB                               | Mycophenolate mofetil<br>with/without daclizumab | MMTT C-pep                | No difference          | 2010                | 16        |
| Anti-CD20 TrialNet                    | Anti-CD20 rituximab                              | MMTT C-pep                | Benefit                | 2009, 2014          | 7,8       |
| Abatacept TrialNet                    | Abatacept                                        | MMTT C-pep                | Benefit                | 2011, 2014          | 9,10      |
| Canakinumab TrialNet                  | Anti-IL1 $\beta$ canakinumab                     | MMTT C-pep                | No difference          | 2013                | 17        |
| START thymoglobulin<br>ITN            | Thymoglobulin                                    | MMTT C-pep                | No difference          | 2013                | 18        |
| T1DAL—alefacept ITN                   | Alefacept                                        | MMTT C-pep                | No difference          | 2013                | 19        |
| IL-2 & rapamycin<br>safety ITN        | IL-2 and rapamycin                               | MMTT C-pep                | Transient<br>worsening | 2012                | 45        |
| AIDA anakinra trial                   | Anakinra                                         | MMTT C-pep                | No difference          | 2013                | 17        |
| $\alpha$ 1-Antitrypsin                | $\alpha$ 1-Antitrypsin                           | MMTT C-pep                | §                      | 2014                | 80        |
| Altered peptide ligand                | B9–23 altered peptide ligand                     | MMTT C-pep                | No difference          | 2009                | 56        |
| Plasmid-encoded<br>proinsulin         | Plasmid-encoded<br>proinsulin                    | Safety MMTT C-pep         | ¶                      | 2013                | 57        |
| Proinsulin peptide                    | Proinsulin peptide                               | Safety study              | No safety issues       | 2009                | 61        |
| ATG–GCSF trial                        | ATG and GCSF                                     | MMTT C-pep                | Benefit                | 2015                | 11        |
| DIATOR                                | Atorvastatin                                     | MMTT C-pep                | No difference          | 2011                | 81        |
| Etanercept                            | Etanercept                                       | MMTT C-pep                | Benefit                | 2009                | 82        |
| Low-dose IL-2 safety<br>trial         | IL-2 (3 doses)                                   | T-reg number              | Increased              | 2013                | 46        |
| REPAIR-T1D                            | Sitagliptin and lansoprazole                     | MMTT C-pep                | No difference          | 2014                | 48        |
| AHSCT + profound<br>immunosuppression | Cyclophosphamide,<br>GCSF, ATG, AHSCT            | MMTT C-pep                | Benefit                | 2007, 2009,<br>2009 | 83–85     |
| AHSCT + profound<br>immunosuppression | Cyclophosphamide,<br>GCSF, ATG, AHSCT            | MMTT C-pep                | Benefit                | 2014                | 86        |
| ATG–GCSF trial                        | ATG and GCSF                                     | MMTT C-pep                | *                      | Ongoing             | 87        |
| EXTEND trial                          | Tocilizumab                                      | MMTT C-pep                | *                      | Ongoing             | 88        |
| Otelixizumab<br>dose-ranging trial    | Otelixizumab                                     | MMTT C-pep                | *                      | Ongoing             | 89        |
| $\alpha$ 1-Antitrypsin trial          | $\alpha$ 1-Antitrypsin                           | Basal C-pep               | *                      | Ongoing             | 90        |
| $\alpha$ 1-Antitrypsin trial          | $\alpha$ 1-Antitrypsin                           | MMTT C-pep                | *                      | Ongoing             | 91        |
| Ustekinumab pilot                     | Ustekinumab                                      | Safety                    | *                      | Ongoing             | 92        |
| Imatinib trial                        | Imatinib                                         | MMTT C-pep                | *                      | Ongoing             | 93        |
| Tauroursodeoxycholic<br>acid trial    | Tauroursodeoxycholic acid                        | MMTT C-pep                | *                      | Ongoing             | 94        |
| DIABGAD                               | GAD-alum & vitamin D with/without<br>ibuprofen   | MMTT C-pep                | *                      | Ongoing             | 95        |
| Proinsulin peptide                    | Proinsulin peptide                               | Safety                    | *                      | Ongoing             | 96        |
| Methyldopa                            | Methyldopa                                       | Inhibition of DQ8 Ag      | *                      | Ongoing             | 97        |
| Low-dose IL-2                         | IL-2                                             | T-reg number              | *                      | Ongoing             | 98        |

AHSCT, autologous hematopoietic stem cell transplantation; C-pep, C-peptide; INT, Immune Tolerance Network; T-reg, regulatory T cell. \*Data not yet available. †Data ambiguous—authors claim benefit but only seen in one dose in post hoc subgroup. N/A—actual data not available; press release announced negative result and study discontinuation. ‡Article retracted. §Data ambiguous—authors claim benefit but single-arm trial and “benefit” unclear. ¶Data ambiguous (as discussed in text).

syndrome, including headache, fever, and hypotension, at the time of infusion of the treatment. These symptoms are not intolerable and are both transient and fully reversible. Thus, they do not constitute major adverse effects that would justify withdrawal of the subject from the study. Cytokine release syndrome has been seen with infusions of anti-CD3 monoclonal antibodies (3,5),

rituximab (7), and thymoglobulin (11,18). Yet, although the infusions have been completed within the first days or within the first month after randomization, beneficial effects from these interventions have been seen 12 months to 4 years after randomization (3–7,11). Thus, subjects may have some discomfort, but there needs to be a reality check as to the potential

benefit versus the discomfort. A few days of symptoms early on need to be balanced with a sustained beneficial outcome over a protracted time frame.

Some of these trials have used anti-histamine and analgesic prophylaxis to obviate symptoms related to cytokine release. At least one trial also used low doses of glucocorticoids (18) but only in the experimental group, not in



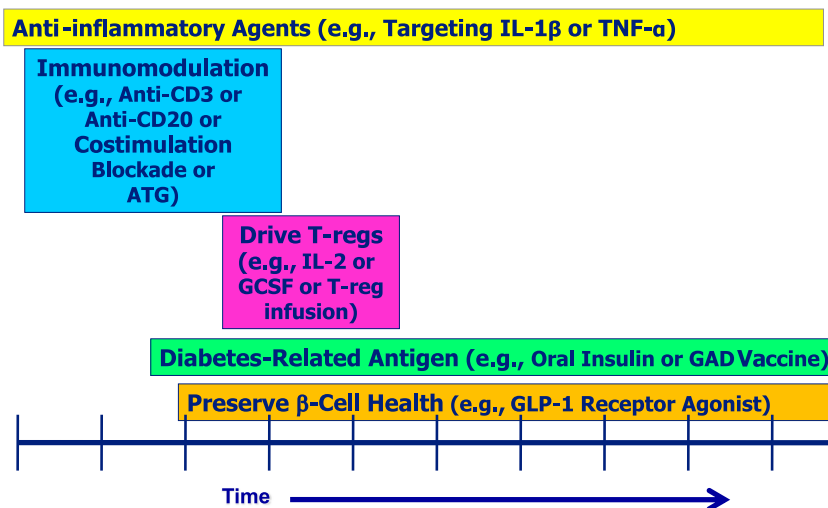

**Figure 4**—Potential scheme of combination therapy using agents with complementary effects. This scheme includes anti-inflammatory therapy targeting innate immunity, immunomodulatory therapy targeting adaptive immunity, therapy driving regulatory immunity, antigen-based therapy directing regulation to  $\beta$ -cells, and an agent promoting  $\beta$ -cell health. T-reg, regulatory T cell.

the placebo group. One might consider giving the same prophylaxis to both experimental and placebo groups in order to minimize the risk of unblinding.

### ERRORS IN TRIAL DESIGN

There have been extensive studies with two anti-CD3 monoclonal antibodies—teplizumab and otelexizumab. The first study with teplizumab (given over 14 days) demonstrated a slower decline of  $\beta$ -cell function (by MMTT) at 1 year (3), with sustained improvement on  $\beta$ -cell function at 2 years (4). Meanwhile, the first study with otelexizumab (given over 6 days) showed a slower decline of  $\beta$ -cell function (measured using a hyperglycemic clamp followed by glucagon stimulation) at 18 months (5). After 4 years of follow-up, although  $\beta$ -cell function was not measured, the otelexizumab group had lower insulin requirements despite similar glycemic control as measured by  $HbA_{1c}$  (6). Thus, effects of a 6-day treatment course appeared to be evident 4 years later.

The results from these early studies with anti-CD3 led to the initiation of phase 3 clinical trials with both agents. Unfortunately, the phase 3 studies did not meet their primary outcome criteria. For teplizumab, the primary outcome was the combination of  $HbA_{1c} < 6.5\%$  and insulin dose  $< 0.5$  units/kg/day (35). This outcome measure was arbitrarily selected without sufficient data to justify its selection. Moreover, by using a composite

outcome that requires a subject to meet two criteria, the outcome becomes a dichotomous measure that dilutes the effect of two continuous variables— $HbA_{1c}$  and insulin dose. More important, when the conventional outcome measure of C-peptide was assessed, there was evidence of efficacy both at 1 year (35) and at 2 years (36) following two 14-day courses of teplizumab (at entry and at 26 weeks into the study). This was especially evident in subjects enrolled in the U.S., in younger subjects (age 8–17 years), in subjects enrolled within 6 weeks of diagnosis, and in subjects with higher levels of C-peptide at entry (35). In addition, the phase 3 study also enrolled subjects in South Asia. Although these subjects met the clinical criteria used for enrollment, it is important to note that typical immune-mediated T1D (also called type 1A diabetes) is a disease principally of Europoid Caucasians. Enrollment of Asian subjects may have confounded the results. Another issue was that the control group in the phase 3 study maintained residual C-peptide to a greater extent and longer than expected, which was especially true for adult subjects. This made it more difficult to detect differences between groups.

For otelexizumab, the phase 3 studies used a dose that was one-sixteenth (total of 3.1 mg over 8 days) of that used in the original phase 2 study (total of 48 mg), in an effort to avoid any side effects (37,38). One has to question what the investigators were trying to avoid. The one noninfusion-related side effect seen

in the first trial with otelexizumab was transient EBV reactivation (39). Although the authors concluded that such EBV reactivation was of no apparent clinical concern over the long term, others have asserted that this must be avoided at all costs (40). I was Chair of the Data Safety Monitoring Committee for that study, and prior to the study the committee had concluded that transient EBV reactivation was possible and would neither constitute a reason to halt the study nor was a side effect that needed to be avoided. So, in the phase 3 trials with use of the lower dose, side effects were obviated; however, beneficial effects were also completely obviated. This unfortunate dose reduction reminds us that all effective therapies are likely to have some side effects and that if one lowers the dose to eliminate all side effects, the drug may no longer have benefit.

### DOSING ISSUES

Getting the dose right is important. In addition to the otelexizumab dosing issue, several other examples are worth noting. Interleukin-2 (IL-2) stimulates regulatory T cells at low doses but also stimulates effector T cells at higher doses (41). Thus, it has been noted that the use of IL-2 is a double-edged sword (42). In other conditions (e.g., hepatitis-C virus–induced vasculitis and graft-versus-host disease), low-dose IL-2 has shown beneficial effects (43,44). The first human study of IL-2 in T1D used a relatively high dose and combined its use with rapamycin (45). An adverse effect on  $\beta$ -cell function was observed. A subsequent study using low-dose IL-2 appeared to be relatively safe, without a decrease in  $\beta$ -cell function and with the expected increase in regulatory T cells (46). Therefore, studies are currently under way to study low-dose IL-2 in T1D.

Another example of a dosing issue is thymoglobulin (ATG). In a study using a relatively high dose of ATG, no beneficial effect was seen, and it was observed that there was suppression of both effector and regulatory T cells (18). In another study in which a lower dose of ATG was used, regulatory T cells were not suppressed (11). Interpretation of that study is confounded, however, because low-dose ATG was used in combination with GCSF.

A related issue providing an additional confounder is choosing surrogate agents. A study in NOD mice found that combination therapy with glucagon-like peptide 1 (GLP-1) and gastrin restores normoglycemia (47). This combination resulted in increases in pancreatic insulin content,  $\beta$ -cell mass,  $\beta$ -cell proliferation, and  $\beta$ -cell neogenesis; a reduction in  $\beta$ -cell apoptosis; and a beneficial effect on the immune response (47). It seemed like a natural combination to test in human beings. Yet, rather than testing the combination of GLP-1 and gastrin, a study evaluated the combination of the dipeptidyl peptidase-4 inhibitor sitagliptin and the proton-pump inhibitor lansoprazole, as these agents, respectively, increase circulating levels of GLP-1 and gastrin (48). The primary end point was not achieved, but not all participants had the expected increases in GLP-1 and gastrin levels. Thus, they effectively did not get the doses that may have been needed to achieve the desired effects.

#### ANTIGEN-BASED THERAPIES HAVE NOT WORKED YET

The desirability of antigen-based immunotherapy is grounded on the notion that such therapies are specific for T1D and are unlikely to have adverse off-target effects. Thus, they should have a high degree of safety. The two diabetes-specific antigens that have been used are insulin and GAD, both of which had great success in animal models of T1D (49,50). Yet, to date, there has been no unambiguous success with antigen-based therapies in human T1D. GAD-alum vaccine has failed in new-onset T1D (12,13). Injected insulin has failed in prevention trials (21,51). Nasal insulin has failed in prevention trials (52). Oral insulin has failed in new-onset T1D (53–55) and did not meet its primary outcome in a prevention trial (20). An altered peptide ligand of insulin failed in new-onset T1D (56). A plasmid-encoding proinsulin was claimed to have a benefit on  $\beta$ -cell function, but actually the effect was seen in but one of four doses tested and only at one time point (57). Moreover, the number of subjects studied at each dose was small, and there did not appear to be statistical adjustment for multiple comparisons. The field is eagerly awaiting the conclusion of ongoing GAD-alum (58), oral insulin (59), and

nasal insulin (60) prevention trials and of the development of an approach that uses a combination of peptides derived from proinsulin (61). Yet, the desirable concept of an antigen-based therapy sustains the efforts to find an effective one, perhaps as a component of a combination therapeutic approach.

#### NOT ALL PEOPLE MAY RESPOND TO THERAPY

In one study using the anti-CD3 monoclonal antibody teplizumab, a group of “responders” to treatment was identified, who at 2 years maintained C-peptide better than the randomized but untreated comparison group (Fig. 3) (62). In that study, responders constituted 48% of subjects treated with teplizumab. Interestingly, the responders not only did better than the comparison group but also, as a group, actually maintained  $\beta$ -cell function essentially at the level seen at randomization, whereas the nonresponders had lost  $\beta$ -cell function at a rate similar to the comparison group. Had the analysis been confined to the total treated group—including both responders and nonresponders—the full retention of  $\beta$ -cell function in nearly half of the subjects would have been missed. Some type of responder analysis should be applied to all intervention studies. Indeed, it has been suggested that a responder analysis be included in the statistical plan for all T1D intervention studies, and for that purpose, the definition of a responder should be the maintenance of 100% of baseline  $\beta$ -cell function (63).

A fundamental question is why some subjects fail to respond. It could be that the immunotherapy used was ineffective (at least at the dose tested), that the immunological process—perhaps a relapsing and remitting one—was in a latent period at the time of drug administration and thus not responsive to immunotherapy, that  $\beta$ -cell mass or  $\beta$ -cell function had already deteriorated to a point of no return, that the immunological processes damaging  $\beta$ -cells are different among individuals, or for some other reason. It is important to assess potential biomarkers that might discriminate responders from nonresponders and thus might be used as enrollment

criteria for future use of a given therapy.

#### FUTURE DIRECTIONS

As discussed above, there have been many attempts at immune intervention in T1D, with mixed results. Table 1 provides a listing of all of the major studies to date, including randomized controlled trials and other studies mentioned in this Perspective; not included are small pilot studies not discussed in this article.

It should be appreciated that in the evolution of T1D several immune pathways are involved. This complicates the design of an ideal therapeutic strategy to control the immune system and prevent the loss of  $\beta$ -cell function and  $\beta$ -cell mass. Indeed, if one pathway is controlled, another pathway may become more active. Thus, success may require that a combination approach be used. Such a combination might include (Fig. 4) one or more anti-inflammatory agents targeting innate immunity, such as agents that target IL-1 (IL-1 $\beta$ ) or tumor necrosis factor (TNF- $\alpha$ ); one or more immunomodulatory agents targeting adaptive immunity, such as anti-CD3, anti-CD20, or costimulation blockade (three agents that already have shown some beneficial effect on preserving  $\beta$ -cell function) or ATG; perhaps some agent that would drive regulatory T cells, such as low-dose IL-2 or GCSF or the infusion of regulatory T cells themselves; any of these perhaps coupled with a diabetes-related antigen that might help target the regulatory T cells to  $\beta$ -cells; and agents that help preserve  $\beta$ -cell health, such as GLP-1 (64). In such a strategy, the combination of agents is selected for having potential complementary effects. It may also be necessary to tailor the selection of agents for different individuals, i.e., we may need to move to a personalized medicine approach with different treatments for different subtypes, if these become better defined (65).

Therefore as outlined, there are many potential interventions that hold promise, particularly if they are used as components of combination therapy. Several new strategies are approaching clinical evaluation. To be successful, we must be patient, yet proceed with diligence. Moreover, it is important that trials be carefully designed, well controlled, and



have adequate sample size to assure valid interpretation.

**Duality of Interest.** No potential conflicts of interest relevant to this article were reported.

## References

- Feutren G, Papoz L, Assan R, et al.; Cyclosporin/Diabetes French Study Group. Cyclosporin increases the rate and length of remissions in insulin-dependent diabetes of recent onset. Results of a multicentre double-blind trial. *Lancet* 1986;2:119–124
- The Canadian-European Randomized Control Trial Group. Cyclosporin-induced remission of IDDM after early intervention. Association of 1 yr of cyclosporin treatment with enhanced insulin secretion. *Diabetes* 1988;37:1574–1582
- Herold KC, Hagopian W, Auger JA, et al. Anti-CD3 monoclonal antibody in new-onset type 1 diabetes mellitus. *N Engl J Med* 2002;346:1692–1698
- Herold KC, Gitelman SE, Masharani U, et al. A single course of anti-CD3 monoclonal antibody hOKT3gamma1(Ala-Ala) results in improvement in C-peptide responses and clinical parameters for at least 2 years after onset of type 1 diabetes. *Diabetes* 2005;54:1763–1769
- Keymeulen B, Vandemeulebroucke E, Ziegler AG, et al. Insulin needs after CD3-antibody therapy in new-onset type 1 diabetes. *N Engl J Med* 2005;352:2598–2608
- Keymeulen B, Walter M, Mathieu C, et al. Four-year metabolic outcome of a randomised controlled CD3-antibody trial in recent-onset type 1 diabetic patients depends on their age and baseline residual beta cell mass. *Diabetologia* 2010;53:614–623
- Pescovitz MD, Greenbaum CJ, Krause-Steinrauf H, et al.; Type 1 Diabetes TrialNet Anti-CD20 Study Group. Rituximab, B-lymphocyte depletion, and preservation of beta-cell function. *N Engl J Med* 2009;361:2143–2152
- Pescovitz MD, Greenbaum CJ, Bundy B, et al.; Type 1 Diabetes TrialNet Anti-CD20 Study Group. B-lymphocyte depletion with rituximab and  $\beta$ -cell function: two-year results. *Diabetes Care* 2014;37:453–459
- Orban T, Bundy B, Becker DJ, et al.; Type 1 Diabetes TrialNet Abatacept Study Group. Costimulation modulation with abatacept in patients with recent-onset type 1 diabetes: a randomised, double-blind, placebo-controlled trial. *Lancet* 2011;378:412–419
- Orban T, Bundy B, Becker DJ, et al.; Type 1 Diabetes TrialNet Abatacept Study Group. Costimulation modulation with abatacept in patients with recent-onset type 1 diabetes: follow-up 1 year after cessation of treatment. *Diabetes Care* 2014;37:1069–1075
- Haller MJ, Gitelman SE, Gottlieb PA, et al. Anti-thymocyte globulin/G-CSF treatment preserves  $\beta$  cell function in patients with established type 1 diabetes. *J Clin Invest* 2015;125:448–455
- Wherrett DK, Bundy B, Becker DJ, et al.; Type 1 Diabetes TrialNet GAD Study Group. Antigen-based therapy with glutamic acid decarboxylase (GAD) vaccine in patients with recent-onset type 1 diabetes: a randomised double-blind trial. *Lancet* 2011;378:319–327
- Ludvigsson J, Krisky D, Casas R, et al. GAD65 antigen therapy in recently diagnosed type 1 diabetes mellitus. *N Engl J Med* 2012;366:433–442
- Raz I, Ziegler AG, Linn T, et al.; DIA-AID 1 Writing Group. Treatment of recent-onset type 1 diabetic patients with DiaPep277: results of a double-blind, placebo-controlled, randomized phase 3 trial [retracted in: *Diabetes Care* 2015;38:178]. *Diabetes Care* 2014;37:1392–1400
- Pozzilli P, Raz I, Peled D, et al. Evaluation of long-term treatment effect in a type 1 diabetes intervention trial: differences after stimulation with glucagon or a mixed meal [retracted in: *Diabetes Care* 2015;38:179]. *Diabetes Care* 2014;37:1384–1391
- Gottlieb PA, Quinlan S, Krause-Steinrauf H, et al.; Type 1 Diabetes TrialNet MMF/DZB Study Group. Failure to preserve beta-cell function with mycophenolate mofetil and daclizumab combined therapy in patients with new-onset type 1 diabetes. *Diabetes Care* 2010;33:826–832
- Moran A, Bundy B, Becker DJ, et al.; Type 1 Diabetes TrialNet Canakinumab Study Group; AIDA Study Group. Interleukin-1 antagonism in type 1 diabetes of recent onset: two multicentre, randomised, double-blind, placebo-controlled trials. *Lancet* 2013;381:1905–1915
- Gitelman SE, Gottlieb PA, Rigby MR, et al.; START Study Team. Antithymocyte globulin therapy for patients with recent-onset type 1 diabetes: a randomized double-blind phase 2 trial. *Lancet Diabetes Endocrinol* 2013;1:306–316
- Rigby MR, DiMeglio LA, Rendell MS, et al.; T1DAL Study Team. Targeting of memory T cells with alefacept in new-onset type 1 diabetes (T1DAL study): 12 month results of a randomised, double-blind, placebo-controlled phase 2 trial. *Lancet Diabetes Endocrinol* 2013;1:284–294
- Skyler JS, Krischer JP, Wolfsdorf J, et al.; Diabetes Prevention Trial–Type 1 Diabetes Study Group. Effects of oral insulin in relatives of patients with type 1 diabetes mellitus. *Diabetes Care* 2005;28:1068–1076
- Diabetes Prevention Trial–Type 1 Diabetes Study Group. Effects of insulin in relatives of patients with type 1 diabetes mellitus. *N Engl J Med* 2002;346:1685–1691
- Keller RJ, Eisenbarth GS, Jackson RA. Insulin prophylaxis in individuals at high risk of type 1 diabetes. *Lancet* 1993;341:927–928
- Füchtenbusch M, Rabl W, Grassl B, Bachmann W, Standl E, Ziegler AG. Delay of type 1 diabetes in high risk, first degree relatives by parenteral antigen administration: the Schwabing Insulin Prophylaxis Pilot Trial. *Diabetologia* 1998;41:536–541
- Ludvigsson J, Faresjö M, Hjorth M, et al. GAD treatment and insulin secretion in recent-onset type 1 diabetes. *N Engl J Med* 2008;359:1909–1920
- Diamyd initiates closure of US phase III study [press release]. Stockholm, Sweden: Diamyd Medical AB; June 23, 2011. Available from <http://www.diamyd.com/docs/pressClip.aspx?section=investor&ClipID=58443>. Accessed 15 February 2015
- Raz I, Elias D, Avron A, Tamir M, Metzger M, Cohen IR.  $\beta$ -Cell function in new-onset type 1 diabetes and immunomodulation with a heat-shock protein peptide (DiaPep277): a randomised, double-blind, phase II trial. *Lancet* 2001;358:1749–1753
- Raz I, Avron A, Tamir M, et al. Treatment of new-onset type 1 diabetes with peptide DiaPep277 is safe and associated with preserved beta-cell function: extension of a randomised, double-blind, phase II trial. *Diabetes Metab Res Rev* 2007;23:292–298
- Lazar L, Ofan R, Weintrob N, et al. Heat-shock protein peptide DiaPep277 treatment in children with newly diagnosed type 1 diabetes: a randomised, double-blind phase II study. *Diabetes Metab Res Rev* 2007;23:286–291
- Huurman VA, Decochez K, Mathieu C, Cohen IR, Roep BO. Therapy with the hsp60 peptide DiaPep277 in C-peptide positive type 1 diabetes patients. *Diabetes Metab Res Rev* 2007;23:269–275
- Schloot NC, Meierhoff G, Lengyel C, et al. Effect of heat shock protein peptide DiaPep277 on beta-cell function in paediatric and adult patients with recent-onset diabetes mellitus type 1: two prospective, randomized, double-blind phase II trials. *Diabetes Metab Res Rev* 2007;23:276–285
- Skyler JS. Struggles with clinical translation of immune intervention trials. *Diabetes Care* 2014;37:1173–1175
- Faustman DL, Wang L, Okubo Y, et al. Proof-of-concept, randomized, controlled clinical trial of Bacillus-Calmette-Guérin for treatment of long-term type 1 diabetes. *PLoS One* 2012;7:e41756
- Elliott JF, Marlin KL, Couch RM. Effect of bacille Calmette-Guérin vaccination on C-peptide secretion in children newly diagnosed with IDDM. *Diabetes Care* 1998;21:1691–1693
- Allen HF, Klingensmith GJ, Jensen P, Simoes E, Hayward A, Chase HP. Effect of Bacillus Calmette-Guérin vaccination on new-onset type 1 diabetes. A randomized clinical study. *Diabetes Care* 1999;22:1703–1707
- Sherry N, Hagopian W, Ludvigsson J, et al.; Protégé Trial Investigators. Teplizumab for treatment of type 1 diabetes (Protégé study): 1-year results from a randomised, placebo-controlled trial. *Lancet* 2011;378:487–497
- Hagopian W, Ferry RJ Jr, Sherry N, et al.; Protégé Trial Investigators. Teplizumab preserves C-peptide in recent-onset type 1 diabetes: two-year results from the randomized, placebo-controlled Protégé trial. *Diabetes* 2013;62:3901–3908
- Aronson R, Gottlieb PA, Christiansen JS, et al.; DEFEND Investigator Group. Low-dose oteplizumab anti-CD3 monoclonal antibody DEFEND-1 study: results of the randomized phase III study in recent-onset human type 1 diabetes. *Diabetes Care* 2014;37:2746–2754
- Ambery P, Donner TW, Biswas N, Donaldson J, Parkin J, Dayan CM. Efficacy and safety of low-dose oteplizumab anti-CD3 monoclonal antibody in preserving C-peptide secretion in adolescent type 1 diabetes: DEFEND-2, a randomized, placebo-controlled, double-blind, multi-centre study. *Diabet Med* 2014;31:399–402
- Keymeulen B, Candon S, Fafi-Kremer S, et al. Transient Epstein-Barr virus reactivation

- in CD3 monoclonal antibody-treated patients. *Blood* 2010;115:1145–1155
40. Sprangers B, Van der Schueren B, Gillard P, Mathieu C. Otelixizumab in the treatment of type 1 diabetes mellitus. *Immunotherapy* 2011;3:1303–1316
  41. Yu A, Snowwhite I, Vendrame F, et al. Selective IL-2 responsiveness of regulatory T cells through multiple intrinsic mechanisms supports the use of low-dose IL-2 therapy in type 1 diabetes. *Diabetes* 2015;64:2172–2183
  42. Bluestone JA. The yin and yang of interleukin-2-mediated immunotherapy. *N Engl J Med* 2011;365:2129–2131
  43. Koreth J, Matsuoka K, Kim HT, et al. Interleukin-2 and regulatory T cells in graft-versus-host disease. *N Engl J Med* 2011;365:2055–2066
  44. Saadoun D, Rosenzweig M, Joly F, et al. Regulatory T-cell responses to low-dose interleukin-2 in HCV-induced vasculitis. *N Engl J Med* 2011;365:2067–2077
  45. Long SA, Rieck M, Sanda S, et al.; Diabetes TrialNet and the Immune Tolerance Network. Rapamycin/IL-2 combination therapy in patients with type 1 diabetes augments Tregs yet transiently impairs  $\beta$ -cell function. *Diabetes* 2012;61:2340–2348
  46. Hartemann A, Bensimon G, Payan CA, et al. Low-dose interleukin 2 in patients with type 1 diabetes: a phase 1/2 randomised, double-blind, placebo-controlled trial. *Lancet Diabetes Endocrinol* 2013;1:295–305
  47. Suarez-Pinzon WL, Power RF, Yan Y, Wasserfall C, Atkinson M, Rabinovitch A. Combination therapy with glucagon-like peptide-1 and gastrin restores normoglycemia in diabetic NOD mice. *Diabetes* 2008;57:3281–3288
  48. Griffin KJ, Thompson PA, Gottschalk M, Kylo JH, Rabinovitch A. Combination therapy with sitagliptin and lansoprazole in patients with recent-onset type 1 diabetes (REPAIR-T1D): 12-month results of a multicentre, randomised, placebo-controlled, phase 2 trial. *Lancet Diabetes Endocrinol* 2014;2:710–718
  49. Anderson MS, Bluestone JA. The NOD mouse: a model of immune dysregulation. *Annu Rev Immunol* 2005;23:447–485
  50. Shoda LK, Young DL, Ramanujan S, et al. A comprehensive review of interventions in the NOD mouse and implications for translation. *Immunity* 2005;23:115–126
  51. Vandemeulebroucke E, Gorus FK, Decochez K, et al.; Belgian Diabetes Registry. Insulin treatment in IA-2A-positive relatives of type 1 diabetic patients. *Diabetes Metab* 2009;35:319–327
  52. Näntö-Salonen K, Kupila A, Simell S, et al. Nasal insulin to prevent type 1 diabetes in children with HLA genotypes and autoantibodies conferring increased risk of disease: a double-blind, randomised controlled trial. *Lancet* 2008;372:1746–1755
  53. Chaillous L, Lefèvre H, Thivolet C, et al. Oral insulin administration and residual beta-cell function in recent-onset type 1 diabetes: a multicentre randomised controlled trial. *Diabète Insuline Orale* group. *Lancet* 2000;356:545–549
  54. Pozzilli P, Pitocco D, Visalli N, et al.; IMDIAB Group. No effect of oral insulin on residual beta-cell function in recent-onset type 1 diabetes (the IMDIAB VII). *Diabetologia* 2000;43:1000–1004
  55. Ergun-Longmire B, Marker J, Zeidler A, et al. Oral insulin therapy to prevent progression of immune-mediated (type 1) diabetes. *Ann N Y Acad Sci* 2004;1029:260–277
  56. Walter M, Philotheou A, Bonnici F, Ziegler AG, Jimenez R.; NBI-6024 Study Group. No effect of the altered peptide ligand NBI-6024 on beta-cell residual function and insulin needs in new-onset type 1 diabetes. *Diabetes Care* 2009;32:2036–2040
  57. Roep BO, Solvason N, Gottlieb PA, et al. Plasmid-encoded proinsulin preserves C-peptide while specifically reducing proinsulin-specific CD8<sup>+</sup> T cells in type 1 diabetes. *Sci Transl Med* 2013;5:191ra82
  58. Lund University. Diabetes Prevention—Immune Tolerance (DIAPREV-IT). In: ClinicalTrials.gov [Internet]. Bethesda, MD, National Library of Medicine, 2010. Available from <https://clinicaltrials.gov/ct2/show/NCT01122446> NLM Identifier: NCT01122446. Accessed 15 February 2015
  59. National Institute of Diabetes and Digestive and Kidney Diseases. Oral insulin for prevention of diabetes in relatives at risk for type 1 diabetes mellitus. In: ClinicalTrials.gov [Internet]. Bethesda, MD, National Library of Medicine, 2007. Available from <https://clinicaltrials.gov/ct2/show/NCT00419562> NLM Identifier: NCT00419562. Accessed 15 February 2015
  60. Melbourne Health. Trial of intranasal insulin in children and young adults at risk of type 1 diabetes (INIT II). In: ClinicalTrials.gov [Internet]. Bethesda, MD, National Library of Medicine, 2006. Available from <https://clinicaltrials.gov/ct2/show/NCT00336674> NLM Identifier: NCT00336674. Accessed 15 February 2015
  61. Thrower SL, James L, Hall W, et al. Proinsulin peptide immunotherapy in type 1 diabetes: report of a first-in-man phase I safety study. *Clin Exp Immunol* 2009;155:156–165
  62. Herold KC, Gitelman SE, Ehlers MR, et al.; AbATE Study Team. Teplizumab (anti-CD3 mAb) treatment preserves C-peptide responses in patients with new-onset type 1 diabetes in a randomized controlled trial: metabolic and immunologic features at baseline identify a subgroup of responders. *Diabetes* 2013;62:3766–3774
  63. Beam CA, Gitelman SE, Palmer JP; Type 1 Diabetes TrialNet Study Group. Recommendations for the definition of clinical responder in insulin preservation studies. *Diabetes* 2014;63:3120–3127
  64. Skyler JS, Ricordi C. Stopping type 1 diabetes: attempts to prevent or cure type 1 diabetes in man. *Diabetes* 2011;60:1–8
  65. Arif S, Leete P, Nguyen V, et al. Blood and islet phenotypes indicate immunological heterogeneity in type 1 diabetes. *Diabetes* 2014;63:3835–3845
  66. Knip M, Virtanen SM, Seppä K, et al.; Finnish TRIGR Study Group. Dietary intervention in infancy and later signs of beta-cell autoimmunity. *N Engl J Med* 2010;363:1900–1908
  67. Knip M, Åkerblom HK, Becker D, et al.; TRIGR Study Group. Hydrolyzed infant formula and early  $\beta$ -cell autoimmunity: a randomized clinical trial. *JAMA* 2014;311:2279–2287
  68. Vaarala O, Ilonen J, Ruohotla T, et al. Removal of bovine insulin from cow's milk formula and early initiation of beta-cell autoimmunity in the FINDIA pilot study. *Arch Pediatr Adolesc Med* 2012;166:608–614
  69. Hummel S, Pflüger M, Hummel M, Bonifacio E, Ziegler AG. Primary dietary intervention study to reduce the risk of islet autoimmunity in children at increased risk for type 1 diabetes: the BABYDIET study. *Diabetes Care* 2011;34:1301–1305
  70. Lampeter EF, Klinghammer A, Scherbaum WA, et al.; DENIS Group. The Deutsche Nicotinamide Intervention Study: an attempt to prevent type 1 diabetes. *Diabetes* 1998;47:980–984
  71. Gale EA, Bingley PJ, Emmett CL, Collier T; European Nicotinamide Diabetes Intervention Trial (ENDIT) Group. European Nicotinamide Diabetes Intervention Trial (ENDIT): a randomised controlled trial of intervention before the onset of type 1 diabetes. *Lancet* 2004;363:925–931
  72. National Institute of Diabetes and Digestive and Kidney Diseases. Teplizumab for prevention of type 1 diabetes in relatives “at-risk.” In: ClinicalTrials.gov [Internet]. Bethesda, MD, National Library of Medicine, 2009. Available from <https://clinicaltrials.gov/ct2/show/NCT01030861> NLM Identifier: NCT01030861. Accessed 15 February 2015
  73. National Institute of Diabetes and Digestive and Kidney Diseases. CTLA4-Ig (abatacept) for prevention of abnormal glucose tolerance and diabetes in relatives at-risk for type 1 diabetes mellitus. In: ClinicalTrials.gov [Internet]. Bethesda, MD, National Library of Medicine, 2010. Available from <https://clinicaltrials.gov/ct2/show/NCT01773707> NLM Identifier: NCT01773707. Accessed 15 February 2015
  74. Silverstein J, Maclaren N, Riley W, Spillar R, Radjenovic D, Johnson S. Immunosuppression with azathioprine and prednisone in recent-onset insulin-dependent diabetes mellitus. *N Engl J Med* 1988;319:599–604
  75. Harrison LC, Colman PG, Dean B, Baxter R, Martin FI. Increase in remission rate in newly diagnosed type I diabetic subjects treated with azathioprine. *Diabetes* 1985;34:1306–1308
  76. Cook JJ, Hudson I, Harrison LC, et al. Double-blind controlled trial of azathioprine in children with newly diagnosed type I diabetes. *Diabetes* 1989;38:779–783
  77. Coutant R, Landais P, Rosilio M, et al. Low dose linomide in type I juvenile diabetes of recent onset: a randomised placebo-controlled double blind trial. *Diabetologia* 1998;41:1040–1046
  78. MacroGenics. Protege Encore study—clinical trial of teplizumab (MGA031) in children and adults with recent-onset type 1 diabetes mellitus. In: ClinicalTrials.gov [Internet]. Bethesda, MD, National Library of Medicine, 2009. Available from <https://clinicaltrials.gov/ct2/show/NCT00920582> NLM Identifier: NCT00920582. Accessed 15 February 2015
  79. Herold KC, Gitelman SE, Willi SM, et al. Teplizumab treatment may improve C-peptide responses in participants with type 1 diabetes after the new-onset period: a randomised controlled trial. *Diabetologia* 2013;56:391–400
  80. Gottlieb PA, Alkanani AK, Michels AW, et al.  $\alpha$ 1-Antitrypsin therapy downregulates Toll-like receptor-induced IL-1 $\beta$  responses in monocytes and myeloid dendritic cells and may improve islet function in recently diagnosed patients with type 1 diabetes. *J Clin Endocrinol Metab* 2014;99:E1418–E1426

81. Martin S, Herder C, Schloot NC, et al.; DIATOR Study Group. Residual beta cell function in newly diagnosed type 1 diabetes after treatment with atorvastatin: the Randomized DIATOR Trial. *PLoS One* 2011;6:e17554
82. Mastrandrea L, Yu J, Behrens T, et al. Etenimcept treatment in children with new-onset type 1 diabetes: pilot randomized, placebo-controlled, double-blind study. *Diabetes Care* 2009;32:1244–1249
83. Voltarelli JC, Couri CE, Stracieri AB, et al. Autologous nonmyeloablative hematopoietic stem cell transplantation in newly diagnosed type 1 diabetes mellitus. *JAMA* 2007;297:1568–1576
84. Couri CE, Oliveira MC, Stracieri AB, et al. C-peptide levels and insulin independence following autologous nonmyeloablative hematopoietic stem cell transplantation in newly diagnosed type 1 diabetes mellitus. *JAMA* 2009;301:1573–1579
85. Voltarelli JC, Martinez ED, Burt RK. Autologous nonmyeloablative hematopoietic stem cell transplantation in newly diagnosed type 1 diabetes mellitus. *JAMA* 2009;302:624–625
86. D'Addio F, Valderrama Vasquez A, Ben Nasr M, et al. Autologous nonmyeloablative hematopoietic stem cell transplantation in new-onset type 1 diabetes: a multicenter analysis. *Diabetes* 2014;63:3041–3046
87. National Institute of Diabetes and Digestive and Kidney Diseases. ATG-GCSF in new onset type 1 diabetes. In: *ClinicalTrials.gov* [Internet]. Bethesda, MD, National Library of Medicine, 2014. Available from <https://clinicaltrials.gov/ct2/show/NCT02215200> NLM Identifier: NCT02215200. Accessed 15 February 2015
88. National Institute of Allergy and Infectious Diseases. TCZ in new-onset type 1 diabetes. In: *ClinicalTrials.gov* [Internet]. Bethesda, MD, National Library of Medicine, 2014. Available from <https://clinicaltrials.gov/ct2/show/NCT02293837> NLM Identifier: NCT02293837. Accessed 15 February 2015
89. GlaxoSmithKline. Investigation of otelexizumab in new-onset, autoimmune type 1 diabetes mellitus patients. In: *ClinicalTrials.gov* [Internet]. Bethesda, MD, National Library of Medicine, 2013. Available from <https://clinicaltrials.gov/ct2/show/NCT02000817> NLM Identifier: NCT02000817. Accessed 15 February 2015
90. Kamada, Ltd. Phase II-III study to evaluate the efficacy and safety of alpha-1-anti-trypsin (Glassia) in type-1 diabetes. In: *ClinicalTrials.gov* [Internet]. Bethesda, MD, National Library of Medicine, 2013. Available from <https://clinicaltrials.gov/ct2/show/NCT02005848> NLM Identifier: NCT02005848. Accessed 15 February 2015
91. Grifols Therapeutics Inc. Study of human plasma-derived alpha1-proteinase inhibitor in subjects with new-onset type 1 diabetes mellitus. In: *ClinicalTrials.gov* [Internet]. Bethesda, MD, National Library of Medicine, 2014. Available from <https://clinicaltrials.gov/ct2/show/NCT02093221> NLM Identifier: NCT02093221. Accessed 15 February 2015
92. University of British Columbia. Pilot clinical trial of ustekinumab in patients with new-onset T1D. In: *ClinicalTrials.gov* [Internet]. Bethesda, MD, National Library of Medicine, 2014. Available from <https://clinicaltrials.gov/ct2/show/NCT02117765> NLM Identifier: NCT02117765. Accessed 15 February 2015
93. University of California, San Francisco. Imatinib treatment in recent onset type 1 diabetes mellitus. In: *ClinicalTrials.gov* [Internet]. Bethesda, MD, National Library of Medicine, 2013. Available from <https://clinicaltrials.gov/ct2/show/NCT01781975> NLM Identifier: NCT01781975 Accessed 15 February 2015
94. Goland, R. Tauroursodeoxycholic acid (TUDCA) in new-onset type 1 diabetes. In: *ClinicalTrials.gov* [Internet]. Bethesda, MD, National Library of Medicine, 2014. Available from <https://clinicaltrials.gov/ct2/show/NCT02218619> NLM Identifier: NCT02218619. Accessed 15 February 2015
95. Ludvigsson, J. DIABGAD—trial to preserve insulin secretion in type 1 diabetes using GAD-alum (Diamyd) in combination with vitamin d and ibuprofen. In: *ClinicalTrials.gov* [Internet]. Bethesda, MD, National Library of Medicine, 2013. Available from <https://clinicaltrials.gov/ct2/show/NCT01785108> NLM Identifier: NCT01785108. Accessed 15 February 2015
96. Cardiff University. Safety study to assess whether proinsulin peptide injections can slow or stop the body damaging its own insulin-making cells in the pancreas in patients newly diagnosed with type 1 diabetes (MonoPepT1De). In: *ClinicalTrials.gov* [Internet]. Bethesda, MD, National Library of Medicine, 2012. Available from <https://clinicaltrials.gov/ct2/show/NCT01536431> NLM Identifier: NCT01536431. Accessed 15 February 2015
97. University of Colorado Denver School of Medicine Barbara Davis Center. Effect of methyldopa on MHC class II antigen presentation in type 1 diabetes. In: *ClinicalTrials.gov* [Internet]. Bethesda, MD, National Library of Medicine, 2013. Available from <https://clinicaltrials.gov/ct2/show/NCT01883804> NLM Identifier: NCT01883804. Accessed 15 February 2015
98. Assistance Publique-Hôpitaux de Paris. dose finding study of IL-2 at ultra-low dose in children with recently diagnosed type 1 diabetes (DFIL2-Child). In: *ClinicalTrials.gov* [Internet]. Bethesda, MD, National Library of Medicine, 2012. Available from <https://clinicaltrials.gov/ct2/show/NCT01862120> NLM Identifier: NCT01862120. Accessed 15 February 2015
